# Supplementary material for: Blood DNA Methylation Predicts Diabetic Kidney Disease Progression in High Fat Diet-Fed Mice
Source: MDPI journal article supplement (doi:10.3390/nu14040785), 2022-02-13
Supplement: s1 [file s1]

# Blood DNA Methylation Predicts Diabetic Kidney Disease Progression in High Fat Diet-Fed Mice

Long T. Nguyen, Benjamin P. Larkin, Rosy Wang, Alen Faiz, Carol A. Pollock and Sonia Saad

## Supplementary document

### Methods

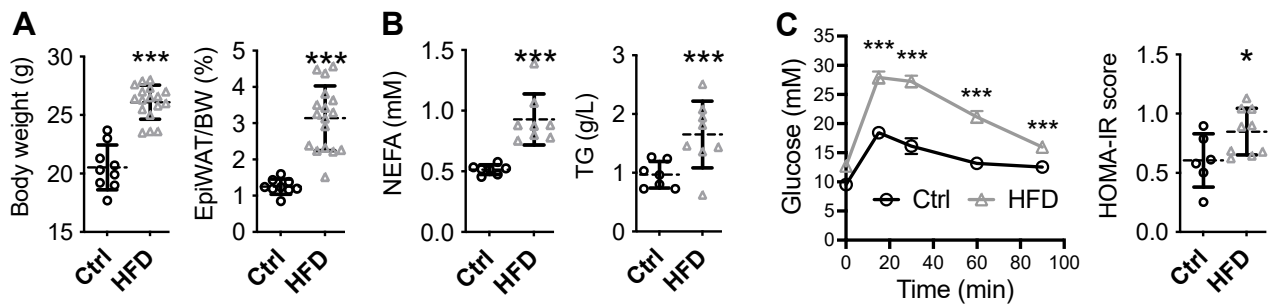

**Figure S1.** High-fat diet induced type 2 diabetes in mice. (A) increased body weight and fat mass, (B) hyperlipidaemia and (C) insulin resistance. \*P<0.05, \*\*\*P<0.001.

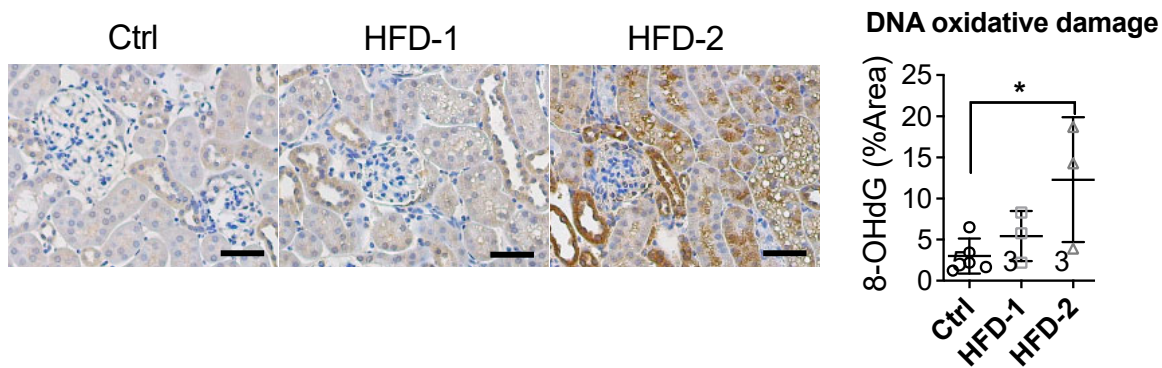

**Figure S2.** Renal levels of DNA oxidative damage reflected by 8-OHdG staining. \*P < 0.05

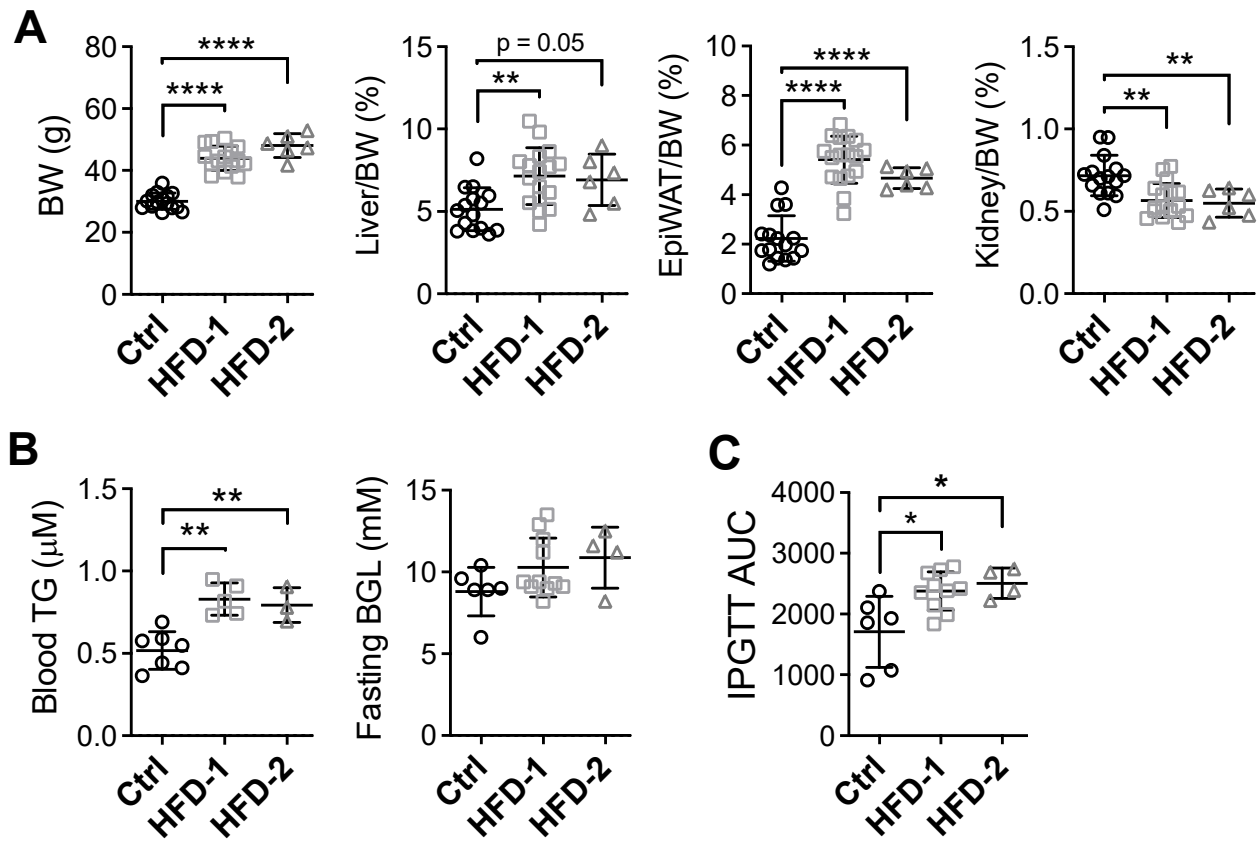

**Figure S3.** Metabolic profiles of HFD-fed animals with and without progressive CKD in comparison to chow. \*P<0.05, \*\*P < 0.01, \*\*\*\*P<0.0001.

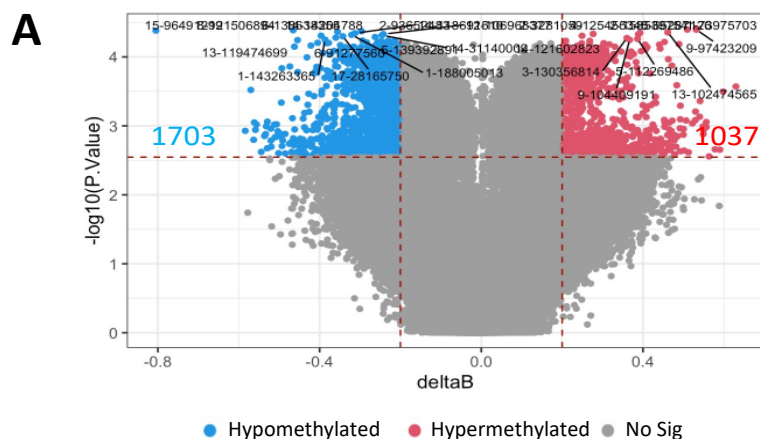

**B**

| Source | Term name                                     | Term ID            | P.adj    |
|--------|-----------------------------------------------|--------------------|----------|
| GO:MF  | protein binding                               | GO:0005515         | 2.24E-16 |
| GO:MF  | binding                                       | GO:0005488         | 1.07E-09 |
| GO:MF  | transcription regulator activity              | GO:0140110         | 3.74E-04 |
| GO:MF  | cadherin binding                              | GO:0045296         | 8.49E-04 |
| GO:MF  | sequence-specific double-stranded DNA binding | GO:1990837         | 1.28E-03 |
| GO:BP  | multicellular organism development            | GO:0007275         | 1.37E-22 |
| GO:BP  | anatomical structure development              | GO:0048856         | 3.33E-20 |
| GO:BP  | system development                            | GO:0048731         | 3.95E-20 |
| GO:BP  | neuron differentiation                        | GO:0030182         | 4.05E-20 |
| GO:BP  | developmental process                         | GO:0032502         | 3.38E-19 |
| GO:CC  | cell junction                                 | GO:0030054         | 3.18E-11 |
| GO:CC  | glutamatergic synapse                         | GO:0098978         | 1.41E-08 |
| GO:CC  | cell-cell junction                            | GO:0005911         | 8.52E-08 |
| GO:CC  | cell projection                               | GO:0042995         | 1.02E-07 |
| GO:CC  | somatodendritic compartment                   | GO:0036477         | 2.36E-07 |
| KEGG   | Wnt signaling pathway                         | KEGG:04310         | 5.58E-08 |
| KEGG   | Glutamatergic synapse                         | KEGG:04724         | 8.53E-05 |
| KEGG   | Axon guidance                                 | KEGG:04360         | 1.60E-04 |
| KEGG   | Rap1 signaling pathway                        | KEGG:04015         | 5.62E-04 |
| KEGG   | Melanogenesis                                 | KEGG:04916         | 9.40E-04 |
| REAC   | Neuronal System                               | REAC:R-MMU-112316  | 3.77E-06 |
| REAC   | Protein-protein interactions at synapses      | REAC:R-MMU-6794362 | 1.01E-04 |
| REAC   | Neurexins and neuroligins                     | REAC:R-MMU-6794361 | 2.09E-03 |
| REAC   | Ca2+ pathway                                  | REAC:R-MMU-4086398 | 6.68E-03 |
| REAC   | Repression of WNT target genes                | REAC:R-MMU-4641265 | 1.11E-02 |
| WP     | Wnt Signaling Pathway NetPath                 | WP:WP539           | 9.65E-04 |
| WP     | TGF Beta Signaling Pathway                    | WP:WP113           | 1.40E-02 |

**Figure S4.** DNA methylation profiling in kidney of HFD-fed mice. A) Volcano plot of differential methylated loci between advanced ( $n = 3$ ) and mild ( $n = 1$ ). The analysis was performed in R using the limma package assuming equal standard deviations. The threshold for changes in methylation level (deltaB) was set at a highly conservative level – 20%. B) Gene-set analysis by G:Profiler. GO: Gene annotation, MF: Molecular function, BP: Biological process, CC: cellular compartment, REAC: Reactome, WP: Wikipathways.
